# Supplementary material for: Sources of Variability in a Synthetic Gene Oscillator
Source: PLoS Comput Biol. 2015 Dec 22;11(12):e1004674. doi: 10.1371/journal.pcbi.1004674 (PMC4692282; doi:10.1371/journal.pcbi.1004674)
Supplement: S1 Dataset — Spreadsheet containing data from each microscope run described in this article. (XLSX) [file pcbi.1004674.s001.xlsx]

## Sheet: lineage1_2mM
time	lineage of cells (new columns indicate cell division)
0	258.5
3	262.48
6		260.06
9		253.26
12		241.63
15		232.71
18		226.54
21		223.49
24			221.34
27			220.33
30			220.03
33			220.37
36			234.27
39			272.03
42				309.98
45				329.12
48				337.25
51				314.35
54				283.72
57				247.09
60				228.25
63				221.5
66					219.72																																			221.82
69					218.51																																			219.84
72					218.88																																			221.68
75					221.2																																			227.72
78					257.02																																			270.93
81					333.28																																			345.62
84					434.43																																			414.8
87						511.5															514.85																			443.58
90						571.3															593.05																			452.9
93						531.87															593.92																				374.78
96						497.54															575.29																				305.36
99						383.26															503.76																				258.04
102						306.59															432.11																				237.11
105						249.47															355.9																				230.43
108						232.03															286.42																				226.16
111						225.95															245.74																				224.94
114							224.81							229.43							232.94																					250.66
117							225.94							241.83								233.85									241.29											331.21
120							232.01							257.93								237.32									251.58											444.54
123							252.24							288.78								245.21									261.5											517.23
126							305.29							362.45								251.62									275.76											588.82
129							368.63							439.22								302.18									336.27											618.62
132							405.61							497.72								406.99									411.91											631.54
135							377.17							499.62									488.68			527.17						461.13					470.03					563.15
138							332.03							463.07									610.21			638.06						493.89					497.95					480.39
141								260.24			279.83				377.25			390.15					640.82			679.28						460.85					482.76						353.64			391.87
144								236.65			248.56				300.58			319.96					687.58			726.39						407.98					437.33						287.06			310.52
147								229.38			241.59				264.7			280.18					662.99			643.93						349.71					371.16						243.74			260.41
150								228.95			241.62				259.03			264.72					631.31			569.82						300.33					320.4						233.9			246.82
153								230.4			243.33				266.75			279.47					551.33			474.68						278.19					303.81						231.08			243.87
156								240.22			258.49				273.39			288.79					478.73			410.52							271.31	271.44			298.75						231.5			245.78
159								295.84			334.92				284.92			313.56					364.56			355.76							275.79	278.71			322.52						238.49				247.45
162									395.87	369.84		436.32	437.13		328.79			338.55					296.53				306.33			338.14			278.43	281.67				316.71	339.74				251.77				263.21
165									460.08	420.5		502.88	507.98		412.97			393.31					282.07				277.48			324.51			280.86	298.49				330.79	361.6					292.23	310.48		301.4
168									521.79	485.74		547.77	567.53		506.48			468.19					277.68				265.16			301.5			283.1	333.93				342.45	352.06					364.64	382		359.42
171									533.23	478.88		507.32	539.59		557.89			552.03						260.62	301.92		268.96			291.18			295.92	407.73				388.42	388.35					412.85	441.7		400.89
174									512.7	443.81		447.88	485.89			561.16	598.56		605.26	610.38				277.85	292.57		271.52			296.65			332.14	513.6				466.59	450.52					434.86	474.12		405.83
177									434.98	385.17		374.15	406.67			531.13	534.11		609.11	631.6				304.26	301.39			289.94	299.22	319.07			390.22	596.9				558.44	530.31					395.34	456.03			396.27	395.36
180									364.47	342.58		323.53	336.75			490.18	487.72		595.28	615.88				337.97	375.6			369.99	372.98	396.99			446.44		665.35	701.21		649.69	578.53					342.59	417.3			359.51	361.56
[truncated: 263 more columns]

## Sheet: lineage2_2mM
time	lineage of cells (new columns indicate cell division)
0	732.59
3	798.86
6	841.7
9		849.9
12		836.35
15		759.23
18		651.6
21		536.8
24		420.54
27		324.52
30		262.65
33			241.3
36			235.35
39			233.04
42			230.43
45			252.22
48			338.67
51			426.81
54			510.44
57				532.94																																													574.43
60				533.66																																													601.5
63				484.72																																													559.07
66				409.87																																													486.84
69				319.18																																													395.29
72				264.42																																													320.1
75				236.56																																													266.83
78				231.49																																													243.36
81				231.99																																													238.4
84				234.3																																													245.11
87					237.4																					242.01																							256.85
90					243.73																					245.66
93					275.13																					273.99
96					351.67																					325.56
99					429.27																					372.97
102					494.13																					395.05
105					507.39																					370.54
108					483.6																					316.67
111					400.33																					267.11
114						315.37							322.63													239.08
117						249.2							234.52													225.74
120						243.39							243.05														229.34															236.75
123						250.32							246.75														236.63															253.1
126						265.16							257.65														300.49															304.2
129						280.66							275.67														420.59															424.53
132						314.55							304.71														548.03															542.88
135						404.16							404.33														650															644.3
138						489.19							522.33															716.85							764.29							713.72
141						547.44								586.71							647.73							678.03							782.35							698.45
144							604.58			578.67				624.87							687.21							581.15							722.15							666.25
147							580.3			568.93				623.83							700.15							457.04							619.16							552.97
150							517.42			502.69				578.67							668.35							373.39							498.33							436.45
153							425.19			396.99				488.55							558.92							319.54								388.77			394.51				358.91			339.9
156							356.77			305.74				399							472.23							287.33								321.97			327.12				296.83			287.97
159							288.8				261.05	263.99			299.83			318.11			369.89								265.37			267.3				282.21			288.36				270.54			273.15
162							252.93				247.34	264.43			253.5			261.52				295.29	301.54						250.79			254.46				265.61			268.16				260.59			281.52
165								243.99	244.28		253.59	272.88			239.19			245.88				258.46	273.07						244.89			252.72				258.06			264.36				268.08			306.26
168								244.23	246.87		263.15	294.29			236.05			245.3				253.73	272.25						259.92			304.07				256.99			267.51				280.57			329.46
171								253.83	258.57		281.02	305.54			241.34			256.27				270.67	292.39						304.52			426.47				288.62			305.33				332.34				358.32	402.01
174								276.38	272.98		328.32	417.06				242.44	252.56	268.1				294.72	314.47						347.72			595.96				388.19			397.59				497.9				447.17	493.29
177								362.7	329.87		436.49	559.54				252.49	273.62	339.94				335.98		359.03	367.54					353.77	384.83	733.48					545.53	576.83		517.46	519.31		721.29				610.31	691.97
180								496.33	439.52		553.47	691.7				260.05	309.58		451.18	452.78		421.86		419.03	422.07					313.68	356.15		824.76	853.48			709.39	783.22		618.93	636.1			909.97	969.34		787.85	951.73
[truncated: 13 more columns]

## Sheet: lineage3_2mM
time	lineage of cells (new columns indicate cell division)
0	221.37
3	223.19
6	256.26
9	320.07
12	389.1
15	433.04
18	437.59
21		384.67
24		334.22
27		274.03
30		239.99
33		226.72
36		223.35
39		224.04
42		227.81
45			223.18																																													242.86
48			233.17																																													258.58
51			286.36																																													325.58
54			368.62																																													406.88
57			459.53																																													501.12
60			537.88																																													575.49
63			582.97																																													617.48
66			589.25																																													622.2
69			574																																													595.15
72			496.07																																													522.11
75			437.16																																													448.5
78			340.48																																													345.56
81			285.07																																													288.32
84			261.24																																														256.31
87			259.7																																														254.98
90			262.28																																														255.64
93			260.21																																														254.67
96				222.25							264.13																																						251.35
99				222.65							273.21																																						255.32
102				293.46								319.97																							337.23														301.46
105				367.58								394.45																							401.02
108				422.26								457.24																							459.57
111				448.14								508.05																							489.21
114				423.08								507.41																							452.74
117					386.1					373.17			469.79									484.48													394.3
120					321.75					297.92			376.33									397.03														326.43							323.09
123					271.07					257.86			311.14									328.79														287.63							290.4
126					246.32					246.18			273.51									294.96														293.25							310.11
129					247.53					250.33			267.37									298.47														308.94							336
132					261.71					266.74			280.49									312.12														330.17							366.17
135					276.45					280.06				280.21	320.5							318.39														335.91							377.27
138					282.79					285.36				282.93	316.11								312.51							321.85						348.64							389.02
141					299.28					290.73				281.47	293.42								303.58							321.19						368.73							405.92
144					333.59					329.84				310.17	302.06								327.17							341.7							389.52			423.95			456.89
147					380.19					388.14				349.34	341.13								388.84							394.87							444.03			459.62			513.25
150					417.66					436.7				379.63	384.27								454.5							461.6							494.6			506.72				577.07	527.99
153					455.86					496.82				392.7	403.44								511.33							517.28							543.49			543.1				627.42	585.58
156					435.87					511.49				369.24		390.78			381.55				507.1							515.9							543.35			539.72				622.58	590.52
159					411.76					527.72				335.76		354.97			353.64					489.21			497.99			506.61							534.24			539.41				619.93	605.84
162						340.07	343.59			476.67				288.7		321.53			326.32					416.03			426.75				436.98			451.99			475.29			485.47				534.22	558.46
165						283.62	290.55			446.07				264.27		292.21			302.6					345.66			354.89				375.93			388.61			418.54			443.48				459.9	547.43
168						253.72	270.94			395.53				261.58		283.38			292.51					301.65			306.5				322.8			341.45				367.33	362.35	392.59				385.48	501.54
171						254.26	283.28			369.92				271.02		278.15			288.34					285.66			281.94				303.5			323.87				319.38	315.14		374.13	366.2		352.15	460.43
174						268.68	304.08			343.79				285.59		279.1			293.22					292.18			273.03				303.19			327.45				289.08	293.32		367.4	355.97		348.02		435.55	424.97
177						295.94	342.41			329.45				309.55			280.96	311.03		314.2	293.21				317.09	292.4	275.38				318.82			348.66				280.56	298.37		381.77	365.38		368.21		402.36	406.91
180						305.28		332.69	371.32	324.88				334.09			336.45	355.73		322.84	304.4				326.15	303.77		279.99	284.63			333.88	324.35	359.06				282.78	306.51		391.04	383.28		374.95		387.97	385.6
[truncated: 28 more columns]

## Sheet: lineage4_2mM
time	lineage of cells (new columns indicate cell division)
0	223.15
3	223.84
6	240.44
9	268.1
12	290.14
15	284.67
18	264.03
21		246.71
24		233.96
27		227.23
30		223.7
33		221.75
36		222.9
39		249.45
42		308.6
45			351.45
48			389.99
51			402.11
54			370.64
57			321.16
60			290.34
63			278.84
66			278.44
69				257.26																																							276.46
72				257.83																																							264.96
75				257.62																																							253.32
78				290.77																																							280.62
81				358.42																																							351.33
84				426.03																																							419.54
87				497.11																																							508.95
90				500.17																																							536.93
93				492.15																																							541.7
96					413.01																			452.16																			489.34
99					345.29																			377.43																			422.39
102					286.16																			308.11																			351.42
105					260.83																			267.78																			304.92
108					255.16																			254.43																			283.56
111					256.39																			253.34																			284.21
114					252.84																			250.5																			280.78
117					246.74																				252.94											240.24								273.95
120						247.52							240.5												247											236.64									265.1
123						278.28							280.76												259.24											257.27									259.87
126						343.03							355.65												321.5											319.74									301.86
129						441.17							455.55												409.21											408.35									390.97
132						505.95							510.36												465.45											470.41									483.92
135						546.46							565.83												499.41											531.41									555.77
138						535.72								546.88					575.55						478.47												569.16			519.26					583.79
141						476.56								482.04					533.17							396.73							426.33				538.12			468					555.26
144							380.53			401.2				392.04					451.77							311.16							342.55				452.17			364.4					489.51
147							307.88			321.4				310.87					366.35							271.17							292.41				378.69			289.34					409.14
150							268.4			284.3				272.86					300.37							267.35							280.41				303.68			249.1					336.93
153							258.31			273.53				259.78					265.71							259.59							269.69				259.69			239.21					295.07
156							256.2			270.97				261.06						259.4			259.74				262.83			255.5			269.39				251.49			237.14					284.79
159							245.07			252.96				254.03						259.69			254.3				257.91			247.83			272.45				250.61				237.54	240.06				262.04			273.38
162							242.32			248.77					242.97			256.52		262.24			256.23				278.52			265.29			281.64					258.29	258.9		235.44	247.96				255.33			263.88
165								246.15	260.03		260.22	267.94			251.13			265.5		260.98			258.35				341.34			325.56				313.32	321.22			259.72	256.25		255.37	252.14				255.81			251.78
168								300.9	329.59		326.78	348.1			299.26			336.95		291.01			310.74				424.67			418.57				368.8	376.6			288.6	275.65		315.72	270.23				281.9			255.94
171								394.97	433.28		425.79	466.51			381.64			452.6		366.19			422.49				512.74			525.57				431.2	429.56			338.21	315.91		401.49	325.16				343.88			304.76
174								488.61	533.33		521.34	608.77			444.74			583.2		482.19			592.4				595.96			625.96				479.74	473.14			454.64	399.58		489.56	405.3				430.5			386.85
177								565.17	598.25		565.21	709.25			485.49			669.42			578.01	571.5	750.11				638.08			678.42				501.36	492.09			601.11	487.42		542.12	468.06					495.21	516.41	462.34
180								636.93	652.97		588.98	813.04				456.89	521.78	748.56			672.94	650.71	907.26					682.07	667.56		707.06	709.5		493.28	487.87			723.95	582.57		555.87	518.23					533.43	570.7	529.15
[truncated: 41 more columns]

## Sheet: lineage5_2mM
time	lineage of cells (new columns indicate cell division)
0	213.28
3	225.81
6	318.51
9	445.73
12	602.12
15	716.01
18		833.82
21		871.85
24		891.91
27		829.62
30		780.66
33		692.57
36			589.04
39			477.28
42			384.33
45			311.27
48			266.33
51				238.54
54				228.21
57				224.02
60				221.45
63				221.82
66				220.98
69				224.3
72					260.5																											266.51
75					331.46																											355.08
78					379.13																											446.76
81					387.85																											522.37
84					335.15																											553.46
87					282.18																											554.93
90					244.35																											517.14
93					231.33																											461.01
96					226.82																											406
99					224.76																											336.01
102					224.3																											283.18
105						247.09											242.02															249.89
108						310.73											301.76															236.84
111						389.47											389.59																242.53									239.85
114						436.91											450.65																259.32									256.04
117						470.71											496.48																275.63									274.52
120						461.75											507.21																288.65									288.23
123						440.13											498.19																304.44									300.78
126						398.85											424.08																344.33									345.14
129						341.85											333.91																390.73									410.22
132						299.73												288.25							269.97									410.34					445.33				502.24
135							276.61					261.47						258.06							239.68									419.9					457.06				537.58
138							258.06					247						248.81							234.18									405.06					446.04				547.9
141							250.04					239.81						244.34							229.99									362.99					407.25				522.41
144							249.89					241.16						240.59							224.12									307.83					354.54				477.64
147							251.87					243.18						239.42							223.6									256.12					295.24				412.7
150							255.22					249.68						272.55							237.69									234.05					254.43				352.31
153							277.2					268.66							367.9			365.83				309.9			283.39					226.94					243.15					304.95			323.08
156								348.56			368.67		313.93			290			484.49			478.87				404.67			353.34						222.47			230.05	252.84					294.18			306.55
159								441.02			489.07		404.35			371.2			599.02			596.35				498.66			410.56						223.65			234.2	264.54					303.42			330.1
162								479.41			600.57		513.95			466.68			669.11			686.41				568.76			418.86						224.07			243.57	275.81					320.63			349.54
165								514.27			690.06		590.08			537.18			694.42			738.58				627.85			357.39						231.63			276.96	287.23					330.82			348.93
168								521.19			729.24		644.83			591.19			714.98			743.12				627.6			307.54						277.08			378.85		305.48	359.4			344.11			345.94
171								512.96			743.45		653.54			606.54			667.99			702.59				617.74			272.07						367.28			511.17		407.82	450.37			345.78			335.75
174								474.22			687.72		650.3			566.25			588.17			620.61				566.6			262.64						453.71			639.37		511.27	545.65			414.5			372.55
177								428.87			614.48		601.02			511.21			490.7			502.31				486.85				247.93	259.54					542.87	512.49	742.32		570.41	611.57				541.56	537.61		448.87	429.01
180									364.39	385.9	516.01			502.39	497.13	443.52				391.37	404.63		384.22	393.33			394.47	416.08		239.33	252.8					579.62	558.73	804.88		590.37	639.41				657.34	666.24		525.13	515.71
[truncated: 57 more columns]

## Sheet: lineage6_2mM
time	lineage of cells (new columns indicate cell division)
0	213.9
3		221.77
6		293.72
9		436.19
12		589.36
15		724.15
18		847.69
21		903.98
24		971.14
27			977.03
30			967.43
33			870.22
36			778.88
39			663.55
42			541.95
45			425.42
48			339.64
51			282.14
54			249.42
57			236.6
60			232.59
63				229.07																															229.59
66				228.38																															228.76
69				229.36																															227.51
72				243.64																															231.11
75				278.13																															244.98
78					312.89																													317.8	271.61
81					332.18																													339.25		297.52
84					319.18																													319.16		302.36
87					279.01																													269.96		281.74
90					244.33																													243.8		251.77
93					230.17																													234.95		235.71
96						225.41															228.05													229.21		227.28
99						224.37															226.05													230.84		225.41
102						225.09															237.14													282.26		227.66
105						244.48															288.94													368.01		242.42
108						283.07															371.31													460.84		281.75
111						313.16															451.31													515.78			303.11
114						334.64															521.13													548.66			319.92
117						332.49															538.2													520.98			302.06
120						323.73															515.97													470.09			263.24
123							286.79							331.18								418.25							456					397.24			243.04
126							263.26							311.24								328.48							369.79					334.36			235.01
129							251.29							291.99								271.48							303.53					293.31			232.88
132							243.95							271.86								251.48							272.79					271.26				222.61							238.12
135							234.11							252.53								236.55							254.47					255.45				224.99							236.14
138							231.9							243.45								228.94							243.99					245.51				253.88							270.23
141								238.8			244.05			252.56									229.66			231.22			242.66					240.21				317.68							345.65
144								288.51			307.11				318.53			321.2					255.91			261.72			292.3					245.22				373.91							426.02
147								372.14			428.09				428.26			431.7					316.98			344.04			392.96					273.88				413.96							506.76
150								435.01			568.34				537.28			554.88					373.4			450.55			497.04					349.66				422.22							547.59
153								452.37			695.25				636.31			655.06					412.89			552.9			581.01					441.9					378.68			425.93				552.59			531.89
156								431.49			785.41				720.44			719.78					413.98			626.4			625.94					521.46					323.28			375.56				482.72			477.78
159								388.86			801.69				743.08			705.84					384.25			621.03			616.37					556.63					277.16			313.42				388.09			391.38
162								352.44			822.5				754.15			677.8					345.32			563.06			584.92					558.19					251.68			269.54				308.7			317.63
165									302.02	345.19	767.21				703.04			611.83					321.82				456.36	503.36	514.08					504.83					251			259.18				268.96			289.9
168									272.88	315.77	697.22				634.22			531.25						281.03	305.75		369.64	405.42	421.66					427.46					251.48			247.67				252.71			274.65
171									257.92	293.93		617.89	589.6		555.45			450.94						258.46	286.23		304.05	324.23	361.54					361.05					245.96			241.75				243.26			259.5
174									247.31	280.83		496.7	487.1			461.61	464.9		387.19	365.69				236.19	260.38		250.6	268.98		279.68	344.9			319.27						237.93	244.03		235.58	242.53			237.18	243.49	252.03
177									241.47	266.6		390.1	393.19			383.63	389.87		334.28	313.94				230.1	259.4		235.29	247.27		258.7		309.47	385.96	311						255.41	287.1		258.89	274.57			264.29	273.08
180									247.28	265.95		316.35	319.98			320.48	331.99		303.13	283.54				248.43	312.51		236.87	245.74		255.95		296.34	371.8	312.71						329	402.14		326.36	377.89			369.07	374.15
[truncated: 197 more columns]

## Sheet: lineage1_0mM
time	lineage of cells (new columns indicate cell division)
0	227.78
3	236.36
6	298.34
9	395.52
12	424.56
15	409.05
18	359.86
21	285.27
24	242.11
27	239.72
30	237
33		266.85
36		314.21
39		305.85
42		278.02
45		251.34
48		242.48
51		237.09
54		236.67
57		235.16
60			250.62
63			267.22
66			260.94
69			240.44
72			237.05
75			233.21
78			233.35
81			234.79
84			250.82
87			290.43
90				311.73																																											322.49
93				285.48																																											288.2
96				255.48																																											253.5
99				244.45																																											242.06
102				235.13																																											238.45
105				247.44																																											262.09
108				281.17																																											308.61
111				285.61																																											309.03
114				267.48																																											283.23
117				248.95																																											262.86
120					245.07																											244.11															258.19
123					238.88																											240.98																248.81
126					238.87																											245.97																248.76
129					255.74																											288																285.85
132					267.77																											326.72																322.68
135					256.37																											322.84																309.97
138					247.96																											292.37																281.06
141					247.86																											265.05																265.85
144						250.64											246.19															260.2																265.74
147						267.68											261.92															258.54																264.95
150						277.95											276.37															255.81																	261.59
153						258.33											255.36															282.84																	271.75
156						247.29											248.29															327.56																	272.4
159						250.29											252.31															349.25																	264.04
162						254.67											254.11															339.3																	267.78
165						271.08											264.41															304.52																	270.14
168						309.33											286.1															287.42																	283.86
171						322.86											285.98															293.61																	326.87
174							309.38			311.02								276.37							277.09							297.55
177							272.12			272.88								273.41							273.92							295.07
180							260.99			258.66								270.98							273.25							300.82
183							261.94			255.81								276.03							311.45								300.41			309.24
186							261.29			271.76								268.4							343.97								285.08			288.33
189							285.91			338.09								258.62							320.49								266.79			259.56
192							315.05			403.5								261.36							276.76								272.07			255.09
195							307.55			417.88								269.76							257.35								284.85				267.15					257.75
198							276.82			403.8								289.37							267.31								332.05				306.2					280.12
201							274.67			358.85								359.23							286.19								424.52				387.73					369.23
204							280.5				318.51			318.67				429.21								319.09			328.42				480.91				429.41					448.07
207							287.99				307.61			306.62				430.51								363.47			375.87				451.95				403.07						475.05	457.53
210								286.62	287.93		287.66			287.24					360.52			360.56				344.89			375.65				378.2				329.49						454.8	449.07
213								323.5	307.93		275.94			264.46					285.13			275.5				275.23			307.29				309.43				274.64						376.06	383.02
216								330.64	326.95		320.7			272.68					276			260.08				254.81			256.85				304.83					265.75			254.05		316.2	307.38
219								296.6	314.47		417.38			312.59					284.73			262.26				258.2			249.51					306.61	306.26			264.71			257.04		299.84	266.59
222								269.49	288.97		484.06			335.91					322.45			301.3				263.81			258.92					305.85	341.24			315.05			324.95		301.42	265.21
225								258.26	287.47		491.25			329.66					403.6			372.76				284.61			306.07					359.7	470.27			422.39			453.56		318.47	268.48
228								256.61	287.98		457.63			315.94					461.67				405.64	401.06		323.91				384.36	403.94			403.89	598.38				538.45	491.02	600.06		411.59		297.14	275.8
231								274.51	283.53			376.02	381.67		323.71	315.78				431.19	439.37		377.76	377.32			316.12	336.73		417.35	440.78			376.34	612.26				542.5	488.26	645.23		509.43		340.72	309.19
234								307.89	313.77			301.94	318.81		309.19	304.71				356.23	374.17		332.85	332.84			284.52	307.77		397.03	419.51			333.24	559.71				491.54	434.27	683.97		582.72		358.75	319.43
[truncated: 63 more columns]

## Sheet: lineage2_0mM
time	lineage of cells (new columns indicate cell division)
0	229.93
3	236.43
6	293.11
9	384.15
12	414.82
15	405.26
18	352.87
21	271.43
24	238.81
27	236.48
30		236.35
33		287.71
36		363.12
39		382.14
42		376.55
45		325.02
48		272.49
51		240.59
54		237.13
57		233.63
60		244.21
63			263.7
66			266.25
69			241.98
72			236
75			232.86
78			233.11
81			233.32
84			253.18
87			344.94
90			459.86
93			482.95
96			460.86
99				347.59
102				258.86
105				243.44
108				244.76
111				253.6
114				289.76
117				308.87
120				288.96
123				251.54
126					240.12																			245.11
129					240.78																			246.81
132					246.37																			251.75
135					280.04																			270.26
138					333.06																			302.46
141					348.78																			313.15
144					322.72																			302.06
147					269.58																			293.14
150					254.31																			279.78
153					246.24																			267.85
156					246.84																			303.4
159					277.6																				362.04															369.71
162						359.01					351.42														399.97															397.92
165						386.78					372.37														361.52															374.46
168						398.33					347.78														306.26															337.27
171						344.56					277.28														275.88															317.01
174						279.92					260.57														276															319.67
177						255.02						251.47							255.2						272.67																298.8							332.07
180						253.29						253.65							251.66							269.58							282.58								302.36							328.92
183						252.85						258.19							252.64							289.77							314.89								341.59							352.04
186							284.63			286.53		258.38							250.67							300.88							329.38								370.35							334.17
189							350.34			340.41		258.47							270.91							273.8							298.39								341.54							292.76
192							403.48			367.8		271.18							328.77							262.85							276.05								304.41							285.22
195							395.31			334.34		268.94							365.09							263.26							278.08								294.7							301.6
198							353.9			281.78		251.73							354.3							265.73							299.46								302.45							324.75
201							284.27			260.39		253.18							312.15							303.56							425.28								313.61								429.33
204							266.74			264.02			260.11			260.35				282.74			277.73				367.24			389.21				592.46			602.73					365.73			371.97				543.93
207							271.41			266.53			287.5			288.4				279.21			271.88				389.17			420.4				693.86			706.4					526.03			524.6				555.87
210							271.94			272.94			340.97			307.66				270.21			259.48				364.75			393.83				756.64			786.39					686.42			680.37				515.3
213							274.19			307.22			365.84			296.77				290.01			253.85				300.16			328.29				694.62			719.52					722.82			752.41				428.57
216							281.36			348.21			338.88			274.21				366.03			258.88				284.15			309.07				609.63			588.25					709.73			767.23				368.17
219								304.57	311.22	330.07			289.41			269.07				421.29			276.2				294.78			304.52				446.13			412.06					598.74			670.77				365.46
222								320.72	313.53	279.54			270.3			263.81				428.74			300.89				353.19			299.31				328.55			313.96					446.73			541.41				374.36
225								292.45	280.11	255.71			259.84				265.4	280.49		383.19			304.08				467.53			308.67				305.07			297.72					333.21			414.15
228								264.47	278.55	252.05				257.19	260.03		306.95	323.55			319.22	338.08	292.76					597.62	641.18	302.11				300.08				301.47	291.3				306.51	314.7	362.52
231								261.91	285.46	252.74				270.52	270.12		309.99	342.29			285.06	299.46	286.69					635.03	688.39		296.03	299.12			296.16	309.58		356.42	349.12				306.4	307.8		333.75	384.57
234								268.42	294.65	269.5				287.75	278.2		282.31	324.68			273.15	278.64	275.88					657.71	726.69		306.37	302.52			353.86	370.87		498.51	495.18				364.37	334.72		340.29	395.9
[truncated: 137 more columns]
